# Supplementary material for: MiRNA expression deregulation correlates with the Oncotype DX® DCIS score
Source: Springer Nature journal article supplement (doi:10.1186/s13058-022-01558-4), 2022-09-12

a.

| Nuclear Grade (N) | Oncotype DX <sup>®</sup> DCIS Risk Score Group |              |      |
|-------------------|------------------------------------------------|--------------|------|
|                   | Low *                                          | Intermediate | High |
| N1 - Low          | 6                                              | 0            | 0    |
| N2 - Intermediate | 14                                             | 4            | 2    |
| N3 - High         | 5                                              | 6            | 3    |

Pearson Chi-squared test  
X-squared = 8.3657 , degree of freedom (df) = 4, p-value = 0.07906

| Nuclear Grade (N) | Oncotype DX <sup>®</sup> DCIS Risk Score Group |                   |
|-------------------|------------------------------------------------|-------------------|
|                   | Low *                                          | Intermediate/High |
| N1 - Low          | 6                                              | 0                 |
| N2 - Intermediate | 14                                             | 6                 |
| N3 - High         | 5                                              | 9                 |

Pearson Chi-squared test  
X-squared = 8.3657 , degree of freedom (df) = 2, p-value = 0.01525  
Fisher's Exact Test for count data  
p-value = 0.01648 , alternative hypothesis: two.sided

\* Total of 26 Low Oncotype DX<sup>®</sup> DCIS risk patients, with only 25 known nuclear grades

b.

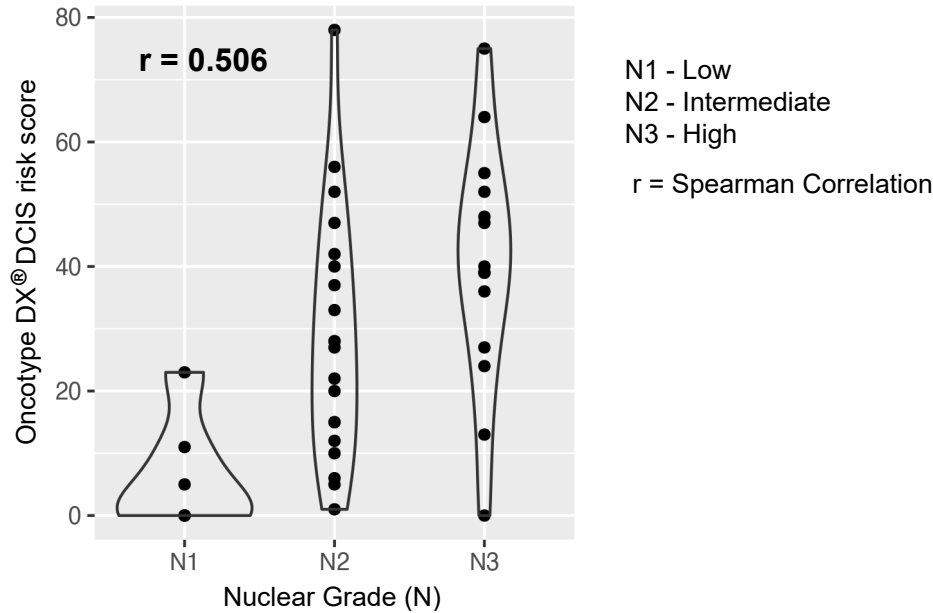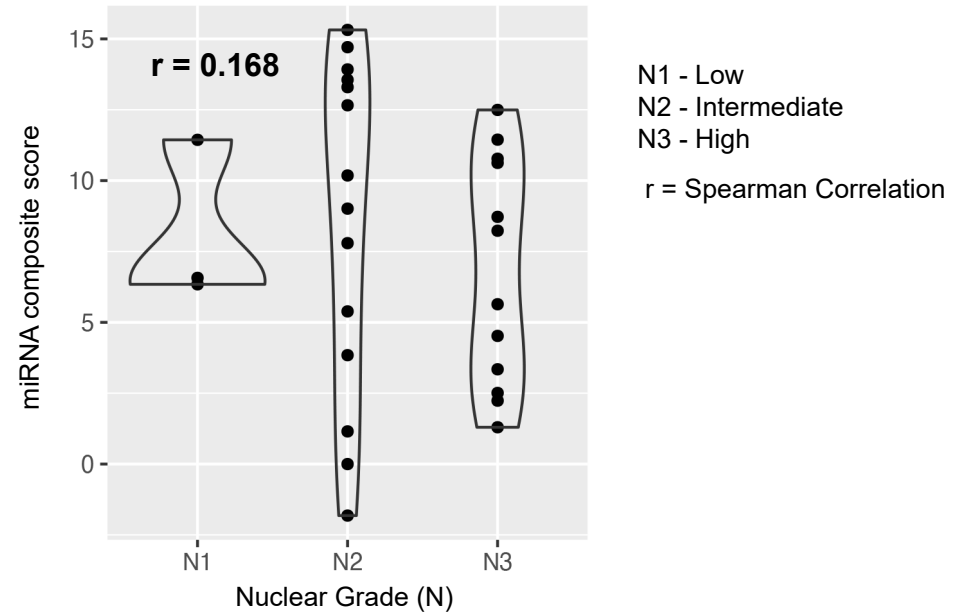

Supplement: MOESM1 [file 23478486]
